# Supplementary material for: Acute effect of short foot exercise on dynamic stability and foot kinematic in trail runners: a proof-of-concept study
Source: PeerJ. 2025 Nov 17;13:e20364. doi: 10.7717/peerj.20364 (PMC12633145; doi:10.7717/peerj.20364)
Supplement: Supplemental Information 1 [file peerj-13-20364-s001.xlsx]

## Sheet: Hoja1
		AHI_Pre	AHI_Post	YBT-A_Pre	YBT-A_Post	YBT-PL_Pre	YBT-PL_Post	YBT-PM_Pre	YBT-PM_Post
1	Low volume	10.4	10.6	80.8	85.9	111.361	103.116	107.613	98.4221
2	Low volume	13.3	13.7	76.4	74.9	107.326	107.326	96.5201	107.509
3	Low volume	13.8	12.7	75.7	78.8	94.3956	94.1026	85.3846	85.8608
4	Low volume	14.7	15.1	73	80	102.305	100.288	95.4733	104.362
5	Low volume	13.8	12.7	78.9	82	100.412	100.037	85.3184	87.2659
6	Low volume	16.4	16.4	76.3	76.7	102.403	102.093	89.1473	91.3566
7	Low volume	16.4	16.4	79.5	78.7	89.1075	98.9435	83.4608	92.459
8	Low volume	18	17.6	76.6	79.2	88.3525	91.954	82.8736	85.0192
9	High volume	19.3	18.1	77	78	97.5	96.9167	93.7917	100.458
10	High volume	9	9.6	78	80.9	95.7831	95.502	90.241	90.6024
11	High volume	21	22.5	71.5	71.1	94.3651	94.8413	85	83.8492
12	High volume	16	16.1	87.9	88.9	98.7226	101.916	84.0319	90.7784
13	High volume	11.8	12.3	72.2	75.2	83.5507	91.4855	77.7536	88.4783
14	High volume	17.4	18.5	79.2	80	99.5582	109.237	80.6827	91.3655
15	High volume	13.4	14.4	76.8	77	96.4815	108.222	93.7778	104.519
16	High volume	17.7	18.4	83.5	85.8	102.845	109.384	98.6412	110.106
